# Supplementary material for: Calorie restriction protects against experimental abdominal aortic aneurysms in mice
Source: PubMed Central journal article supplement — J Exp Med. 2016 Oct 17;213(11):2473–88. doi: 10.1084/jem.20151794 (PMC5068228; doi:10.1084/jem.20151794), 2016-10-17
Supplement: JEM_20151794_sm.pdf [file JEM_20151794_sm.pdf]

## SUPPLEMENTAL MATERIAL

Liu et al., <http://dx.doi.org/10.1084/jem.20151794>

Table S1. Primers used for genotyping

| Gene                               | Primer   | Sequence (5'-3')          | Primer type    |
|------------------------------------|----------|---------------------------|----------------|
| <i>ApoE</i>                        | oIMR180  | GCCTAGCCGAGGGAGAGCCG      | Common         |
|                                    | oIMR181  | TGTGACTTGGAGCTCTGCAGC     | WT reverse     |
|                                    | oIMR182  | GCCGCCCCGACTGCATCT        | Mutant reverse |
| <i>SM22<math>\alpha</math>-Cre</i> | oIMR7055 | GGCCCAGGGTTGTCAAAATAGTC   | Common         |
|                                    | oIMR7056 | CTCCTCCAGCTCCTCGTCATACTTC | WT reverse     |
|                                    | oIMR7057 | CGCCGCATAACCAAGTAAACAG    | Mutant reverse |
| <i>Sirt1-LoxP</i>                  | oIMR7909 | GGTTGACTTAGGTCTTGTCTG     | Forward        |
|                                    | oIMR7912 | CGTCCCTTGAATGTTTCCC       | Reverse        |

Table S2. Primers used for measuring relative mRNA expression

| Gene                          | Forward (5'-3')        | Reverse (5'-3')         |
|-------------------------------|------------------------|-------------------------|
| <i>Actb</i>                   | GCATTGTTACCAACTGGGACC  | GCTGGGGTGTGAAGTCTC      |
| <i>Hk1</i>                    | CGGACCACAGTTGGCGTAGA   | TCCCTTGCCACTGCCACTCT    |
| <i>Hk4</i>                    | AGTGGAGCGTGAAGACGAAAC  | AAGGTGAAGCCCAGGGGTAGT   |
| <i>PKI<math>\alpha</math></i> | AAGGGTCCCAGATACGCA     | GGTAGTCCACCCACACTGTCTTT |
| <i>PK<math>\beta</math></i>   | GCCTGGACATTGACTCTGCC   | ATCTCCTTCAGCATCTCCACAG  |
| <i>Acadl</i>                  | TTCCTCGGAGCATGACATTTT  | TGATGCCAAGCAAGCCCT      |
| <i>Cpt1a</i>                  | GCTGGCTTATCGTGGTGGT    | CGCCACTCAGATGTTCTTC     |
| <i>Lipe</i>                   | AAACGCAACGAGACAGGCCTCA | ATGCCATGTTGCCAGAGACGA   |
| <i>Pnpla2</i>                 | ATTTATCCCGGTGACTGTG    | GGGACACTGTGATGGTATTC    |
| <i>Fasn</i>                   | CGGCTGCTGTTGGAAGTCA    | TGCCTCTGAACCACTCACACC   |
| <i>Ndufs8</i>                 | GTTCATAGGGTCAGAGGTCAAG | TCCATTAAGATGTCTGTGCG    |
| <i>Sdhb</i>                   | ACCCCTTCTCTGTCTACCG    | AATGCTCGTCTCCTTGTAG     |
| <i>Uqcrc1</i>                 | ATCAAGGCACTGTCCAAGG    | TCATTTTCTGCATCTCCCG     |
| <i>Cox5b</i>                  | ACCCTAATCTAGTCCCCTCC   | CAGCCAAAACAGATGACAG     |
| <i>Atp5a1</i>                 | CATTGGTGATGGTATTGCGC   | TCCCAAACACGCAACTCC      |
| <i>Sirt1</i> (exons 3-4)      | GTTCTGACTGGAGCTGGGGTTT | ATGGCTTGAGGGTCTGGGAG    |
| <i>Sirt1</i> (exons 5-6)      | AGGTTGCAGGAATCCAAAGG   | TCTCCAGAACAGCTTACAAT    |
| <i>Mmp2</i>                   | CAAGTTCCCCGGCGATGTC    | TTCTGGTCAAGGTCACCTGTC   |
| <i>Mmp9</i>                   | CACCACAGCCAATGATGACCA  | CAGGAAGACGAAGGGGAAGAC   |

Table S3. Primers used in tissue ChIP

| Gene        | Promoter region<br>bp | Forward (5'-3')        | Reverse (5'-3')        |
|-------------|-----------------------|------------------------|------------------------|
| <i>Mmp2</i> | -919 to -784          | CAAGCCAAGGGATAGAGGACA  | GCAAGGATAATCTGAAAGGAGG |
|             | -669 to -485          | CAACTCAGAAGTACATCGTCC  | GGTTTCACTGGTGGCTCAAT   |
|             | -404 to -261          | CTTGAGTGGCTCTATGGCTGAT | TGCTTTGGAGGATACTGG     |
|             | -260 to -105          | AGGCCCTGATCCAATCTTTAA  | TTCTTCCATCCCCATCCC     |
| <i>Actb</i> | -306 to -207          | GCAGGCCTAGTAACCGAGACA  | AGTTTTGGCGTAGGGTCT     |
